# Supplementary material
Source: MDPI journal article supplement (https://www.mdpi.com/2305-7084/8/1/20)
Supplement: s1 [file s1]

Archive with 1 entries (1 files):
- ChemEngineering-2803140-supplementary.pdf
