# Supplementary material
Source: MDPI journal article supplement (https://www.mdpi.com/2305-7084/8/1/20)
Supplement: s1 [file s1 › ChemEngineering-2803140-supplementary.pdf]

# Novel Bi-Functional MoS<sub>2</sub>/α-Fe<sub>2</sub>O<sub>3</sub> Nanocomposites for High Photocatalytic Performance

Islam Ibrahim <sup>1,2,3</sup>, Pinelopi P. Falara <sup>1,4</sup>, Elias Sakellis <sup>1</sup>, Maria Antoniadou <sup>5</sup>, Chrysoula Athanasekou <sup>1</sup> and Michalis K. Arfanis <sup>1,\*</sup>

- <sup>1</sup> Institute of Nanoscience and Nanotechnology, National Centre for Scientific Research (NCSR) “Demokritos”, Agia Paraskevi, 15341 Athens, Greece; i.ibrahim@inn.demokritos.gr (I.I.); pin.falara@gmail.com (P.P.F.); e.sakellis@inn.demokritos.gr (E.S.); c.athanasekou@inn.demokritos.gr (C.A.)  
<sup>2</sup> Department of Chemistry and Biochemistry, Florida International University, Miami, FL 33199, USA  
<sup>3</sup> Department of Chemistry, Faculty of Science, Al-Azhar University, Nasr City, Cairo 11884, Egypt  
<sup>4</sup> School of Chemical Engineering, National Technical University of Athens, Zografos Campus, 15773 Athens, Greece  
<sup>5</sup> Department of Chemical Engineering, University of Western Macedonia, 51000 Kozani, Greece; mantoniadou@uowm.gr  
\* Correspondence: m.arfanis@inn.demokritos.gr; Tel.: +30-21-0650-3668

## SUPPLEMENTARY INFORMATION

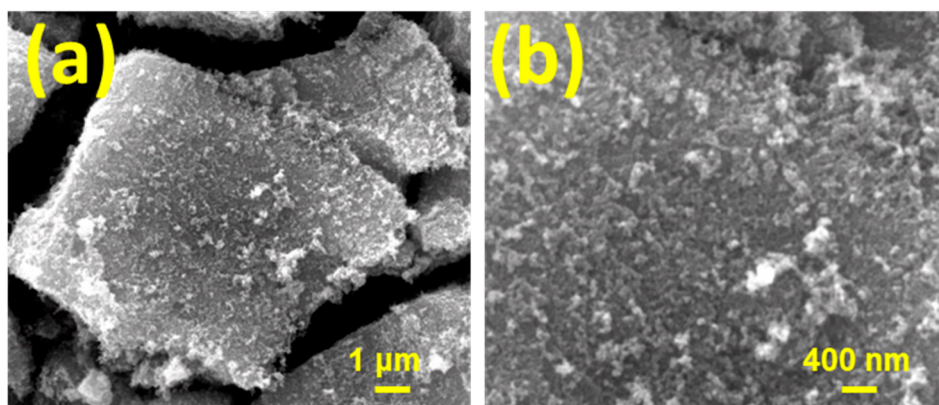

**Figure S1.** SEM images of hematite, in x20000 (a); and x50000 (b); magnification.

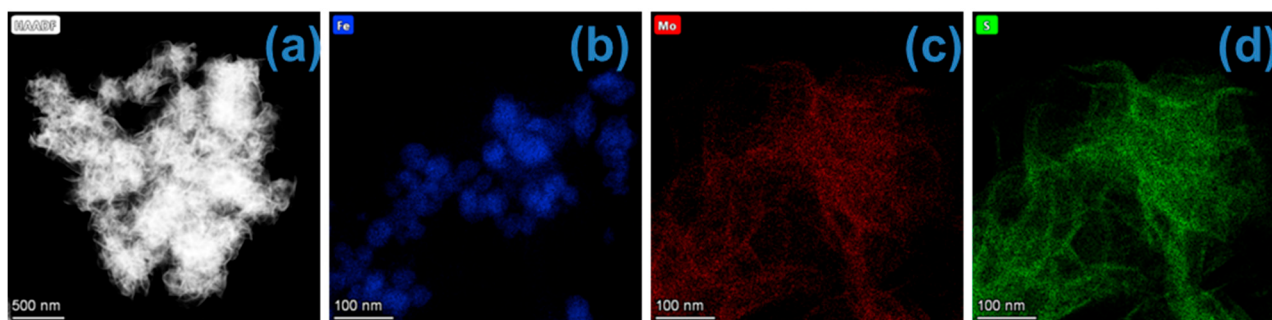

**Figure S2.** HAADF\_STEM image of MoFe (2:1) (a); and the corresponding elemental mapping images of Fe K- edge (b; blue), Mo K-edge (c; red) and S K-edge (d; green).

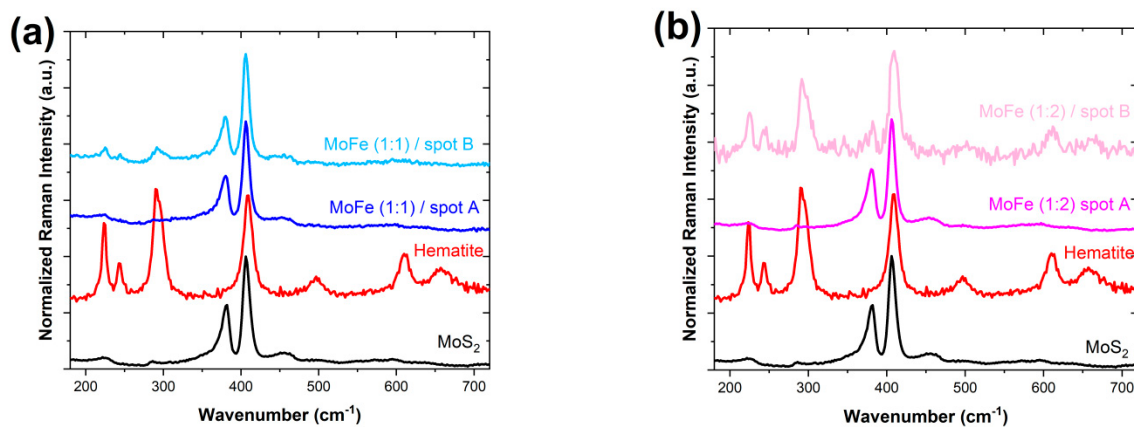

**Figure S3.** Raman examination of MoFe (1:1) (a); and MoFe (1:2) (b) at different spots across their surface.

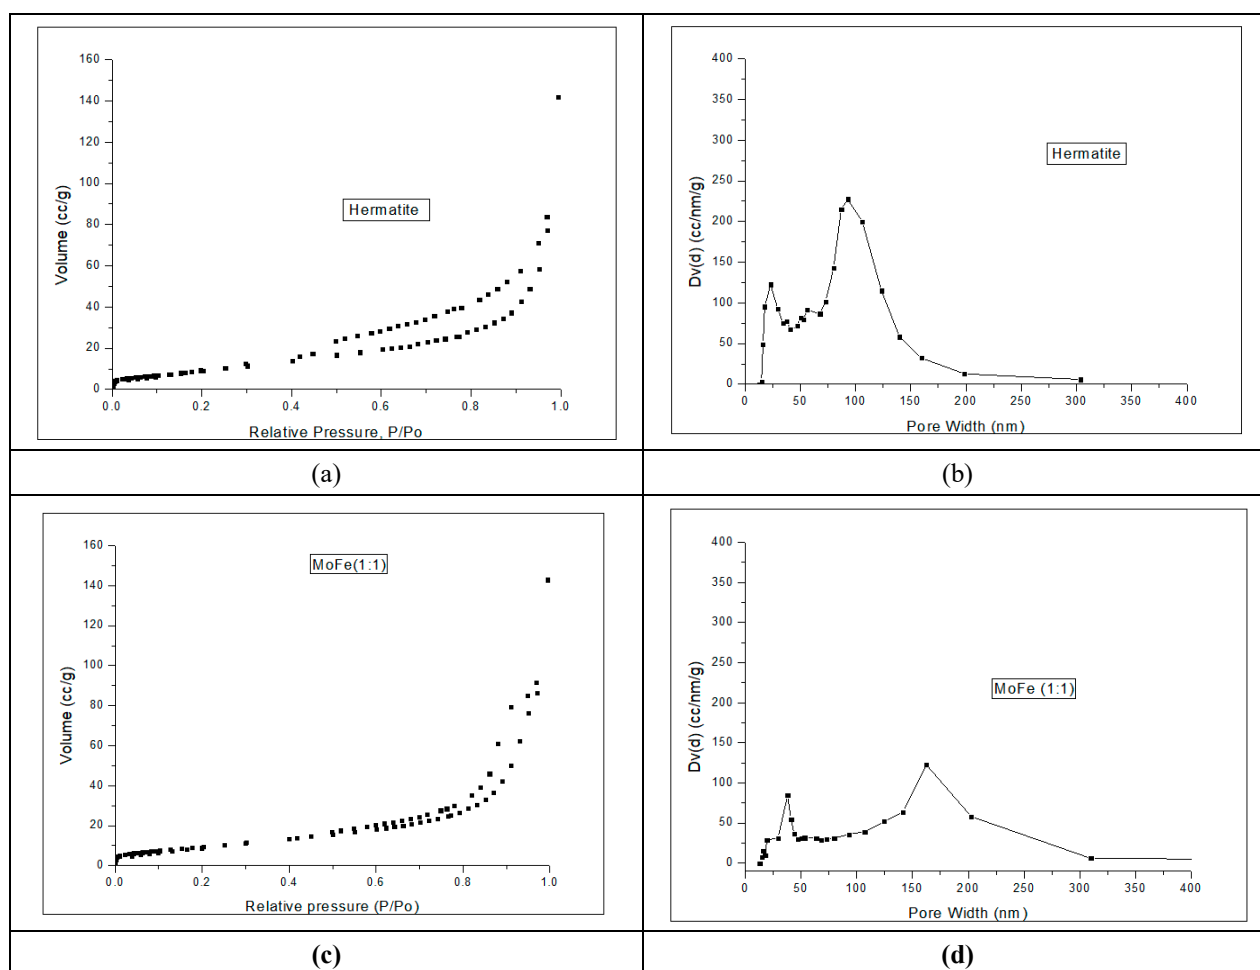

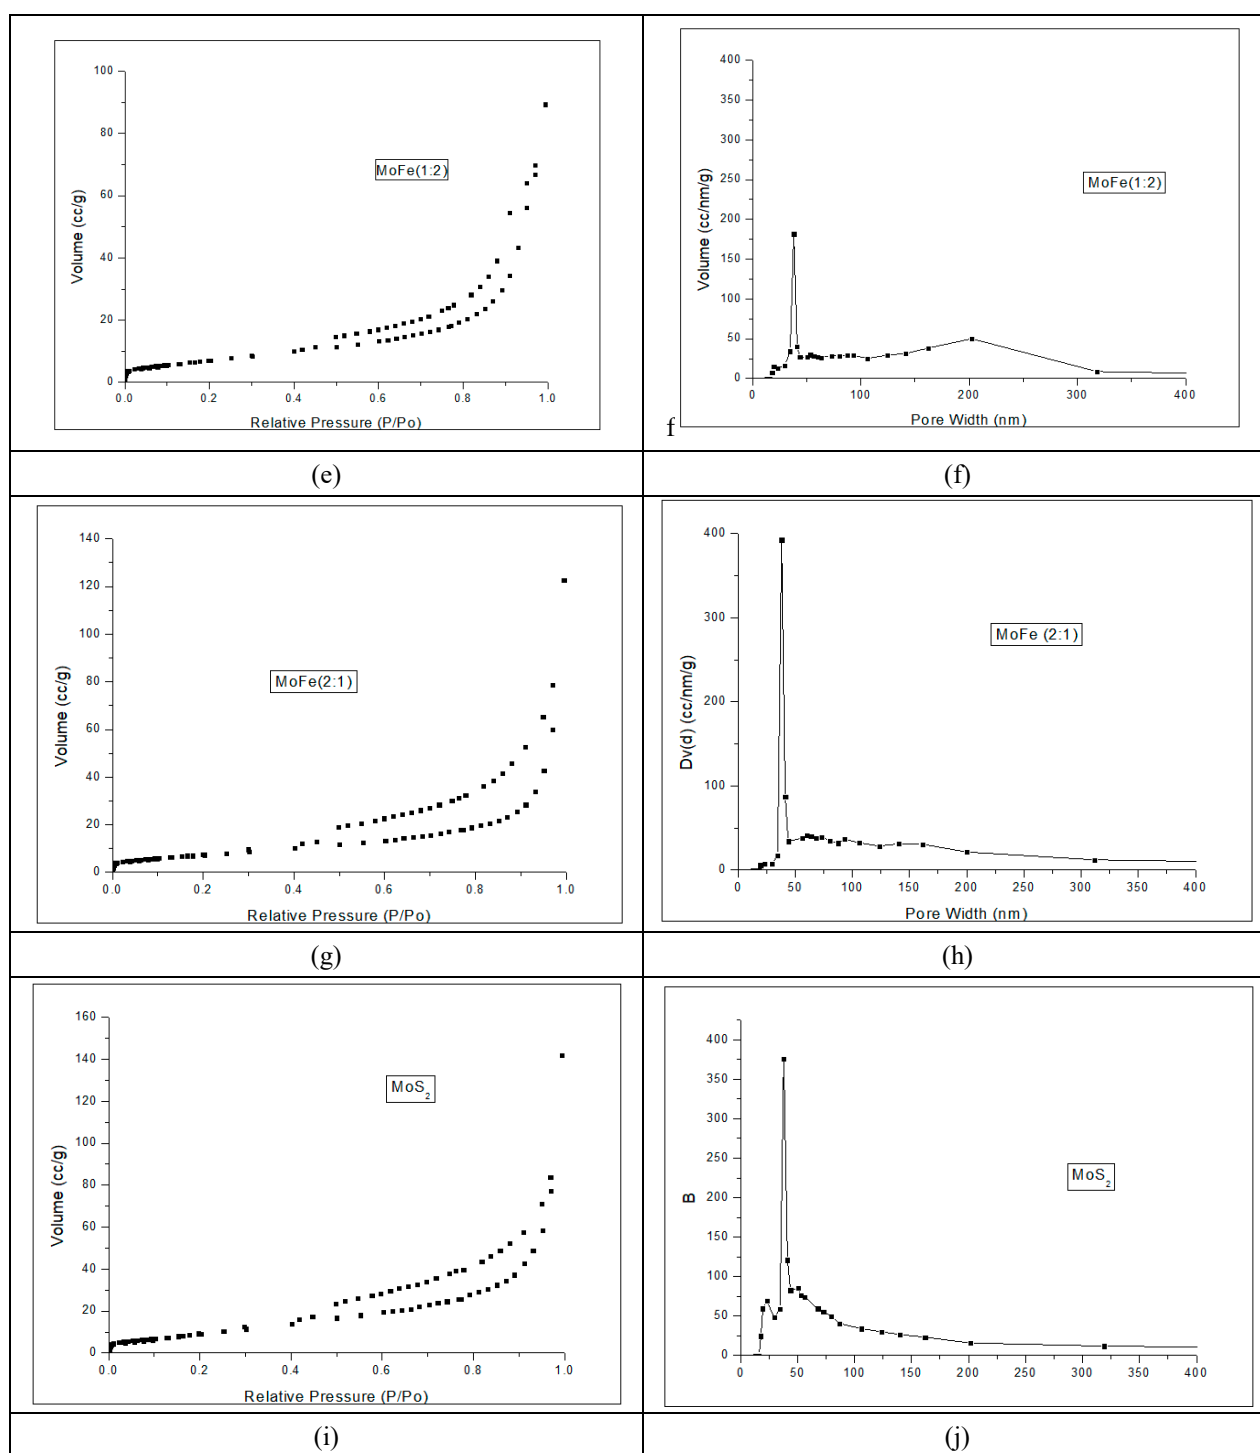

**Figure S4:**  $N_2$  adsorption-desorption isotherms (a,c,e,g,i) and pore size distribution (b,d,f,h,j) curves of the prepared photocatalysts.
